# Supplementary material
Source: PubMed Central journal article supplement (PMC1859941)
Supplement: pnas_0608396103_2.pdf [file pnas_0608396103_2.pdf]

Chromosome condensation and segregation

Kinetichore formation

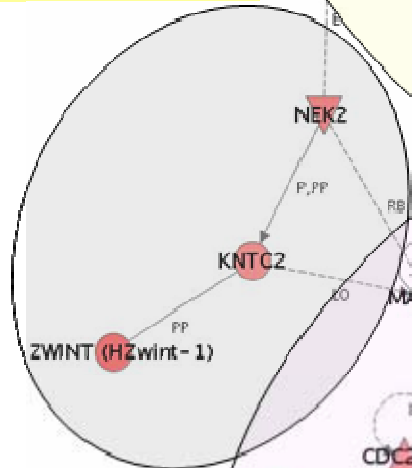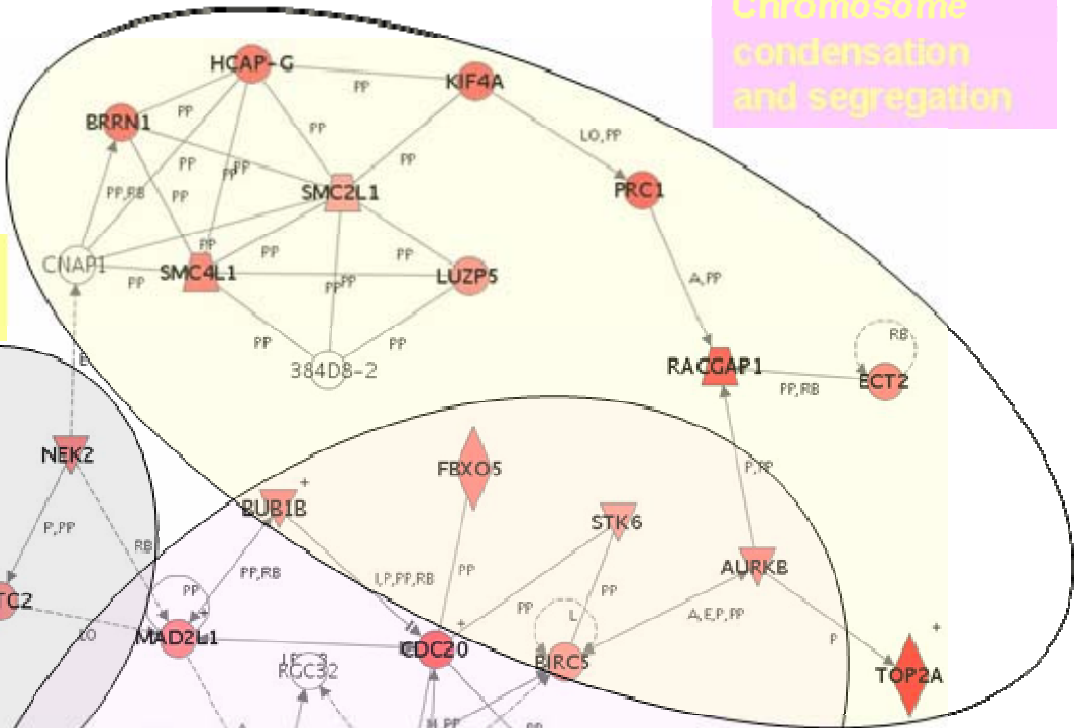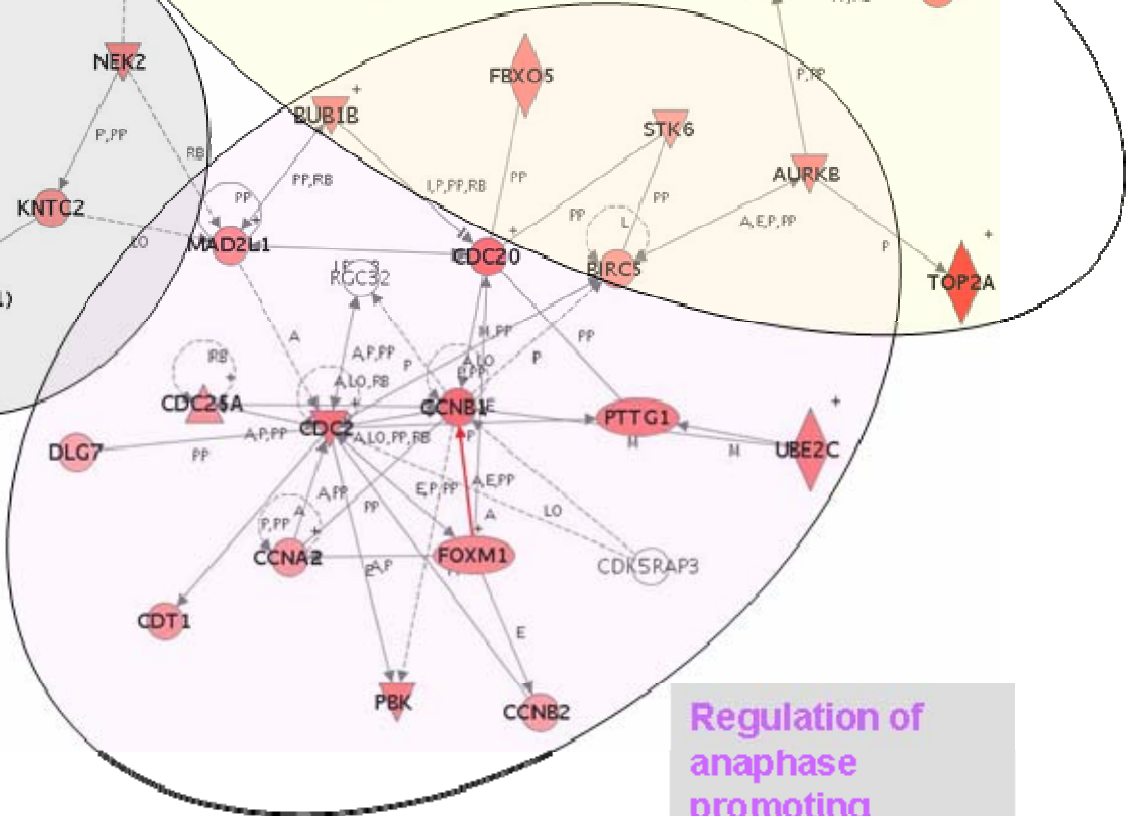

Regulation of anaphase promoting complex and mitotic cyclins
